# Supplementary material for: Comparing the defence-related gene expression changes upon root-knot nematode attack in susceptible versus resistant cultivars of rice
Source: PubMed Central journal article supplement (PMC4785349; doi:10.1038/srep22846), 2016-03-10
Supplement: srep22846-s1.pdf [file srep22846-s1.pdf]

## SUPPLEMENTARY INFORMATION

***Title: Comparing the defence-related gene expression changes upon root-knot nematode attack in susceptible versus resistant cultivars of rice***

*Authors:*

Chanchal Kumari<sup>1,2</sup>, Tushar K. Dutta<sup>1</sup>, Prakash Banakar<sup>1</sup> and Uma Rao<sup>1,\*</sup>

*Affiliations:*

<sup>1</sup>Division of Nematology, ICAR-Indian Agricultural Research Institute, New Delhi, India, 110012

<sup>2</sup>School of Biotechnology, Kalinga Institute of Industrial Technology, Bhubaneswar, India, 751024

*\*Corresponding Author*

Dr. Uma Rao

Division of Nematology

ICAR-Indian Agricultural Research Institute

New Delhi, India-110012

TEL: +91-112-584-2721

Email: [umarao@iari.res.in](mailto:umarao@iari.res.in); [umanema@gmail.com](mailto:umanema@gmail.com)

**Supplementary Table S1.** Primers used for gene expression studies.

| <b>Gene</b>      | <b>Locus ID</b>         | <b>Forward primer (5'-3')</b> | <b>Reverse primer (5'-3')</b> |
|------------------|-------------------------|-------------------------------|-------------------------------|
| <i>Os18srRNA</i> | GenBank: AF069218       | CGCGCAAATTACCCAATCCTGACA      | TCCCGAAGGCCAACGTAAATAGGA      |
| <i>Os-actin</i>  | RAP-DB:<br>Os03g0718100 | CTCTCAGCACATTCCAGCAG          | AGGAGGACGGCGATAACAG           |
| <i>OsMAPK5a</i>  | RAP-DB:<br>Os03g17700   | GTCTGCTCCGTGATGAAC            | TGATGCCTATGATGTTCTCG          |
| <i>OsMAPK6</i>   | RAP-DB:<br>Os06g0154500 | GATACATTCGCCAACTTCC           | CAGTGATGCCAGGTAAGG            |
| <i>OsMPAK20</i>  | RAP-DB:<br>Os01t0629900 | TCAACTCCAATTCCTGCCAAG         | AACAACCTCTCCTGGTCTTGC         |
| <i>OsPAL1</i>    | RAP-DB:<br>Os02g41630   | TGTGCGTGCTTCTGCTGCTG          | AGGGTGTGATGCGCACGAG           |
| <i>OsICS1</i>    | RAP-DB:<br>Os09g19734   | TGTCCCCACAAAGGCATCCTGG        | TGGCCCTCAACCTTTAAACATGCC      |
| <i>OsEDS1</i>    | RAP-DB:<br>Os09t0392100 | CAGGAGAGGCAGTGTTAATCG         | GCAAGCGGAGTAAGTGGTATG         |
| <i>OsPAD4</i>    | RAP-DB:<br>Os11t0195500 | TCAGAGGCAAGGCAGTAGTG          | ACCGCTCACGCAGGATAG            |
| <i>OsNPR1</i>    | RAP-DB:<br>Os01t0194300 | AGAAGTCATTGCCTCCAG            | ACATCGTCAGAGTCAAGG            |
| <i>OsAos2</i>    | RAP-DB:<br>Os03t0225900 | GCGAGAGACGGAGAACCC            | CGACGAGCAACAGCCTTC            |
| <i>OsJMT1</i>    | RAP-DB:<br>Os06g0314600 | CACGGTCAGTCCAAAGATGA          | CTCAACCGTTTTGGCAAACCT         |
| <i>OsJAMYB</i>   | RAP-DB:<br>Os11g45740   | GAGGACCAGAGTGCAAAAGC          | CATGGCATCCTTGAACCTCT          |
| <i>OsACS1</i>    | RAP-DB:<br>Os03g51740   | GATGGTCTCGGATGATCACA          | GTCGGGGGAAAACCTGAAAAT         |
| <i>OsACO7</i>    | RAP-DB:<br>Os01g39860   | GGACTACTACCAGGGCACCA          | GATTAGCGCACGCGATTTTA          |
| <i>OsEIN2</i>    | RAP-DB:<br>Os07g06130   | TAGGGGGACTTTGACCATTG          | TGGAAGGGACCAGAAGTGTT          |
| <i>OsERF1</i>    | RAP-DB:<br>Os04g46220   | AAGGGTCATAATTCGCGTCA          | TCCACACCACAAGACATCGT          |
| <i>OsPR1a</i>    | GenBank: EF061246       | AACTTCGTCGGCCAATCTC           | CATGCATAAACACGTAGCATAGC       |
| <i>OsPR1b</i>    | GenBank: EF061247       | TACGACTACGCCTCCAACA           | CCGGCTTATAGTTGCATGTGA         |
| <i>OsPR10</i>    | GenBank:AF274850        | ACGCCTAAGATGAAGAGGAATAC       | CTCAAACGCCACGAGAATTTG         |
| <i>OsWRKY13</i>  | RAP-DB:<br>Os01t0750100 | GCCAGCGGAGAACGAATC            | CTCCTCCTGCTTCACAACC           |
| <i>OsWRKY45</i>  | RAP-DB:<br>Os05g0322900 | AATTCGGTGGTCGTCAAGAA          | AAGTAGGCCTTTGGGTGCTT          |
| <i>OsC4H</i>     | RAP-DB:<br>Os05g0320700 | CAGACTGGTGAGATCCGGTG          | TTCCCATTTCGATCGACCAC          |
| <i>OsCAD6</i>    | RAP-DB:<br>Os04g0229100 | TCGGTAAGAGGACGGTGAGT          | TGTCGATGTCCCAGGTGATG          |
| <i>OsGSL1</i>    | GenBank: AP001389       | TGAGGACCTGCCACGATT            | CACGCTGATTGCGAACAT            |
| <i>OsGSL3</i>    | GenBank: AP003268       | TGGCAAGCGACCACATAG            | AGACCTTAGCACGGACTG            |
| <i>OsGSL5</i>    | GenBank: AP008212       | GTGGTGTCCCTGCTATGA            | GTTGTTTGCTATTCTCCC            |
| <i>OsGNS5</i>    | GenBank: U72251         | TTGCGGCCATTCTACAGT            | TGGTGAGGGCGATGCTTG            |
